# Supplementary material
Source: PubMed Central journal article supplement (PMC2229872)

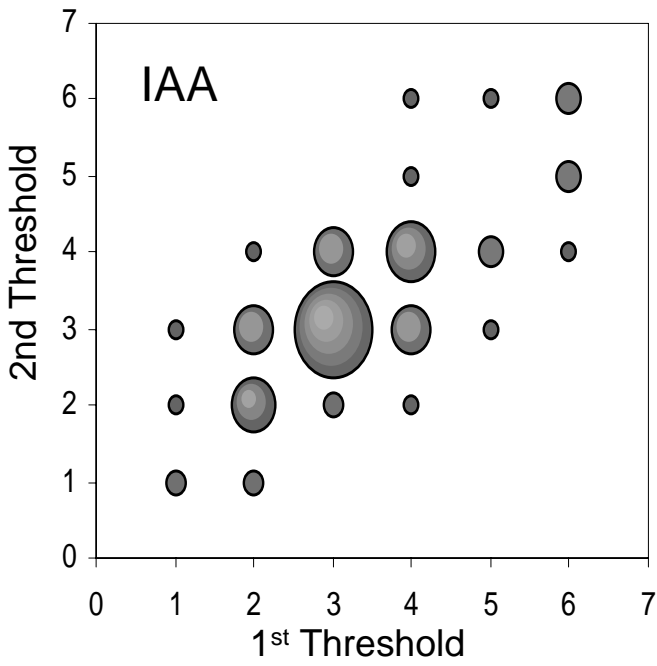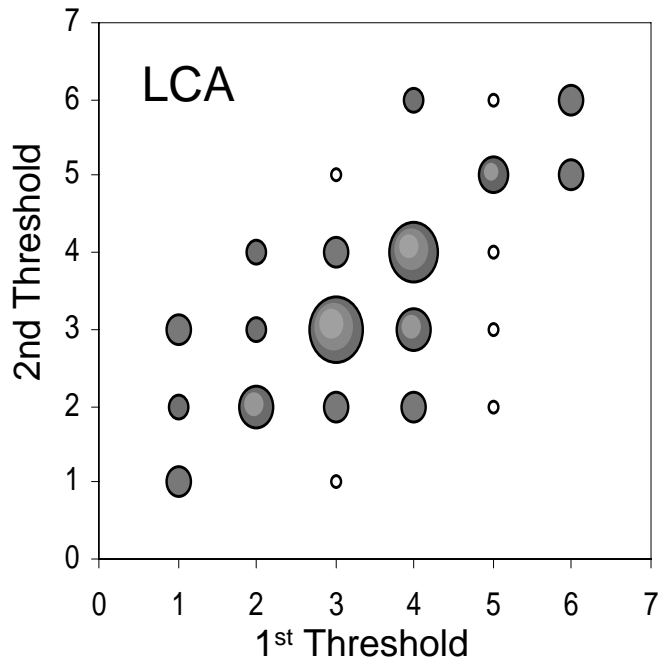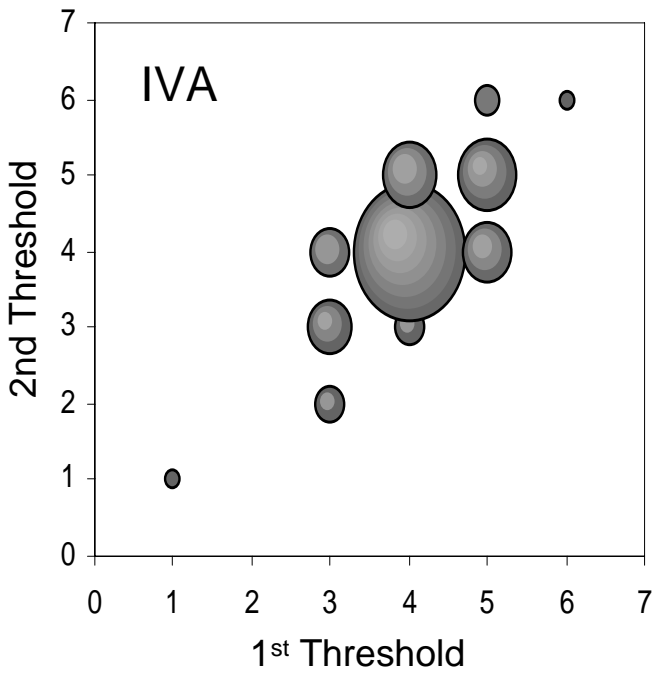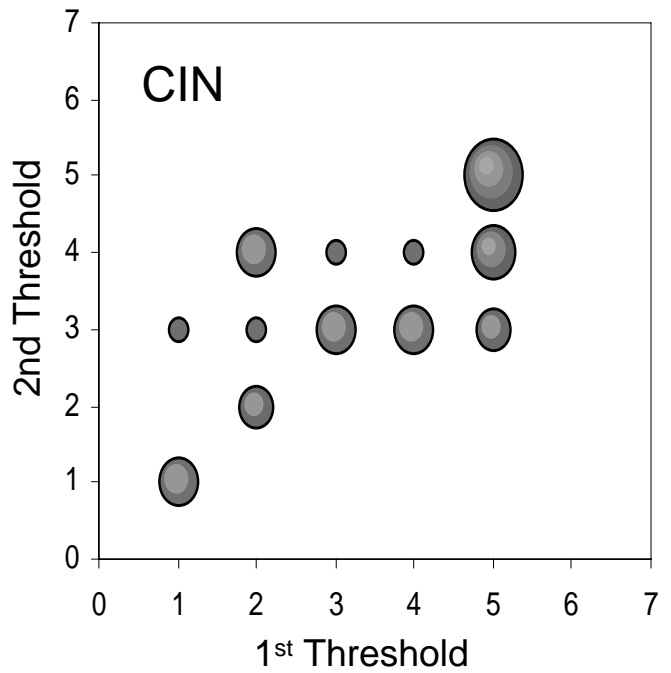

Supplement: pbio.0050284.sg001.pdf [file pbio.0050284.sg001.pdf]

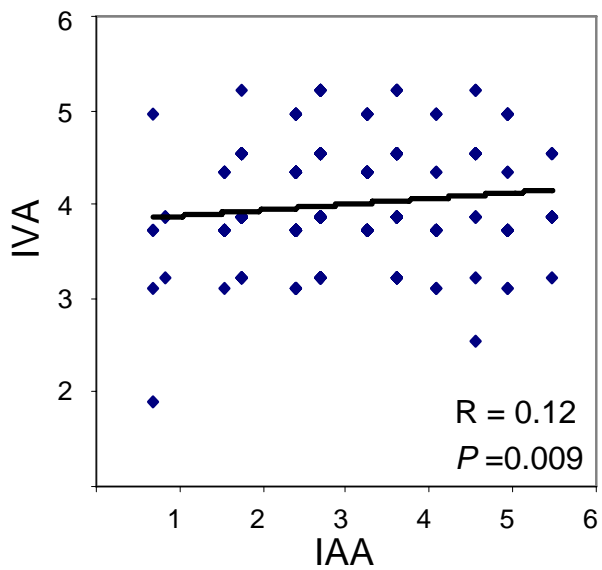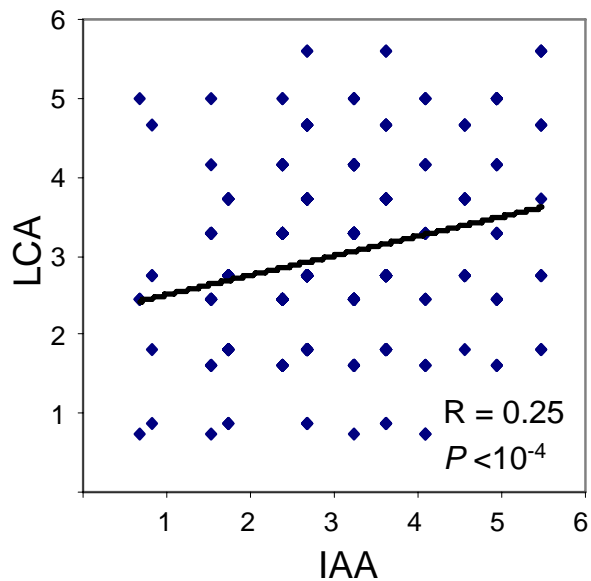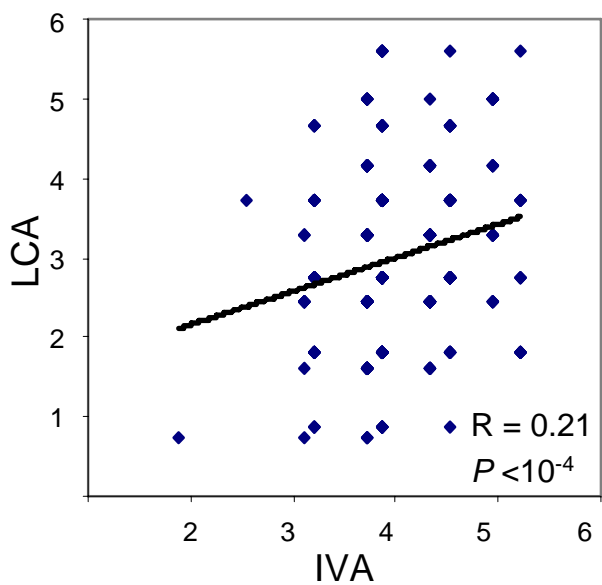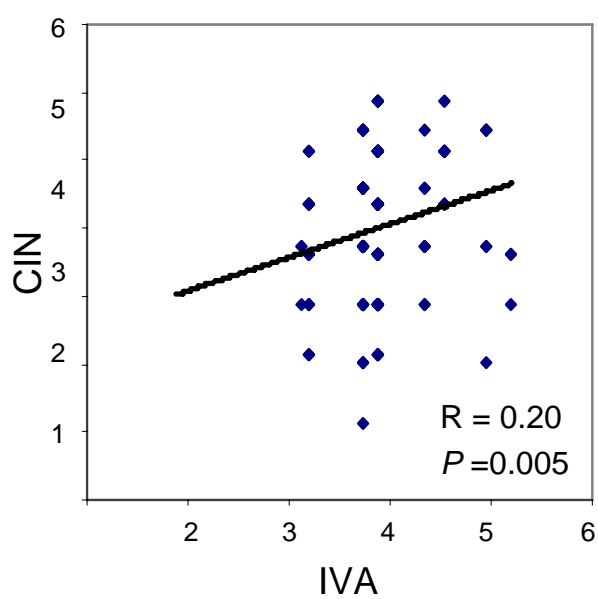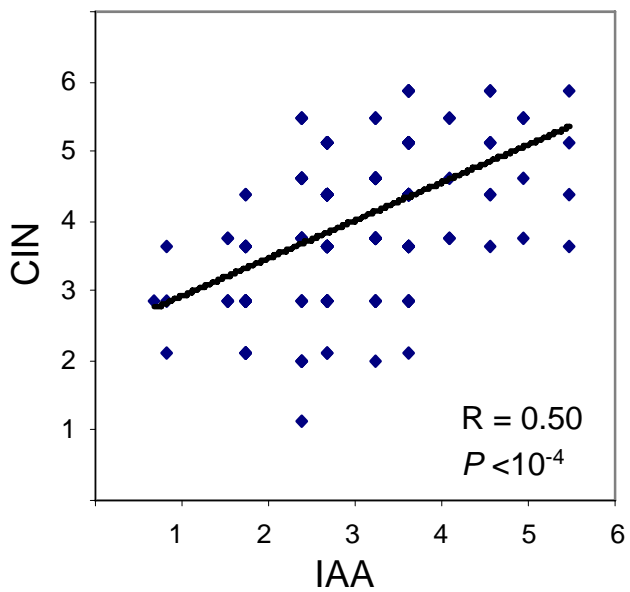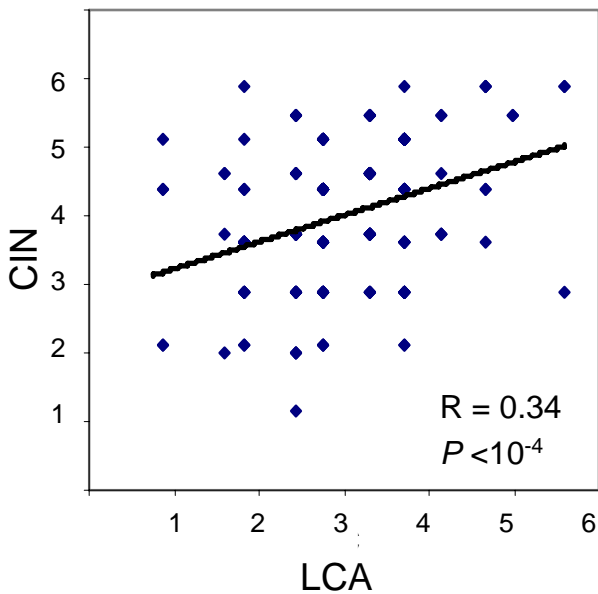

Supplement: pbio.0050284.sg002.pdf [file pbio.0050284.sg002.pdf]
